# Supplementary material
Source: Springer Nature journal article supplement (https://www.springermedizin.de/resource/supplementary/13000_2010_339_MOESM6_ESM.pdf/9624310)

- page loads / yearly average
- page loads / monthly average
- page loads / day

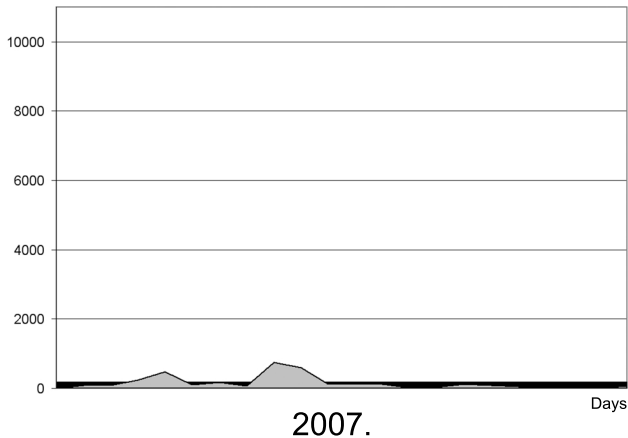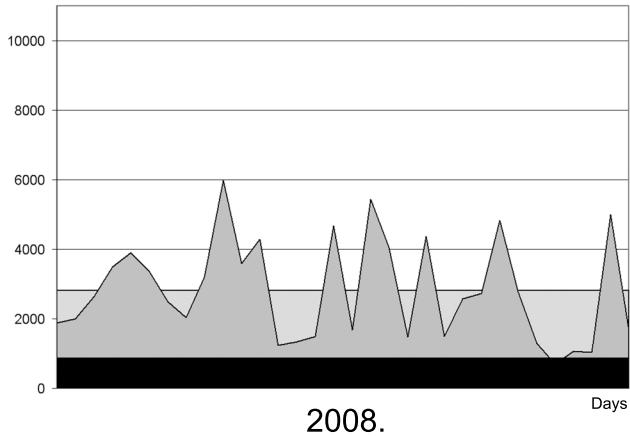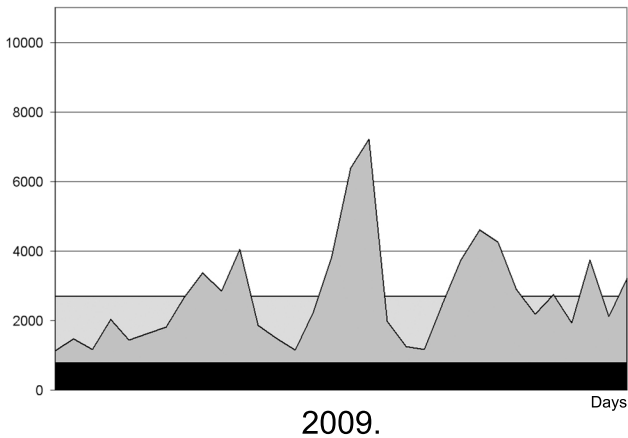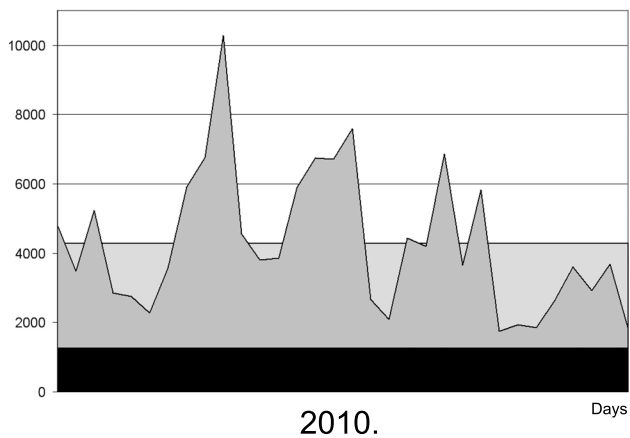

Supplement: MOESM6 [file 9624310]
